# Supplementary material for: Two RECK Splice Variants (Long and Short) Are Differentially Expressed in Patients with Stable and Unstable Coronary Artery Disease: A Pilot Study
Source: MDPI journal article supplement (doi:10.3390/genes12060939), 2021-06-19
Supplement: s1 [file s1]

## SUPPLEMENTARY TABLES AND FIGURES

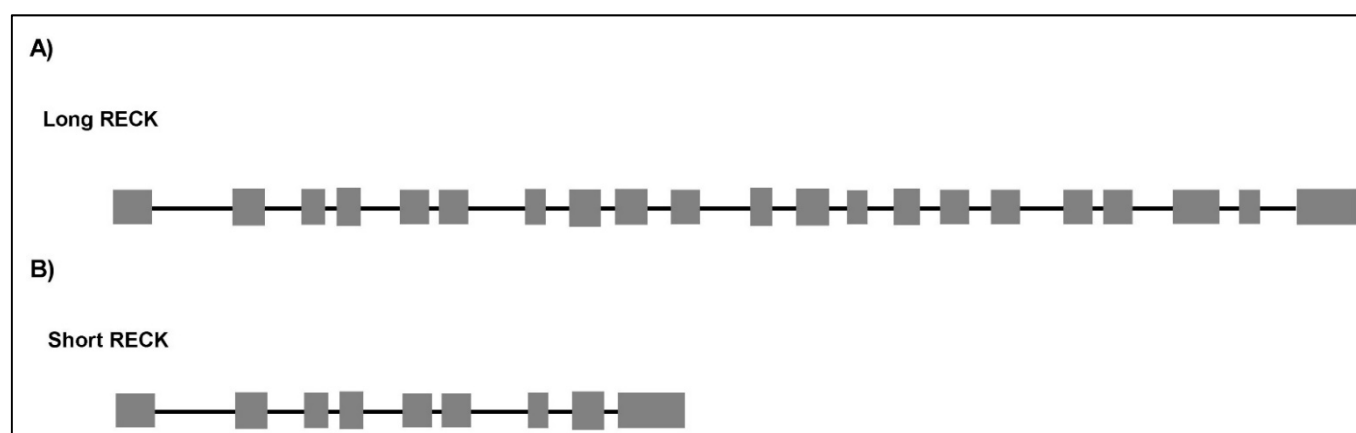

**Supplementary Figure S1.** The human *RECK* gene spans 87 kb on chromosome region 9p13. (A) Genomic structure of Long *RECK* splice variant. This transcript is 4412 bp long and is constituted by 21 exons. (B) Genomic structure of Short *RECK* splice variant. This transcript is 1833 bp long and is constituted by 9 exons. Grey boxes indicate exons.

**Supplementary Table S1.** Clinical features of CTR and CAD patients (n=2) selected for sequencing study.

|                            | CTR subjects | CAD patients | <i>p</i> -value |
|----------------------------|--------------|--------------|-----------------|
| Age (years)                | 70.5 ± 11.1  | 71.5 ± 4.9   | n.s.            |
| Gender                     |              |              |                 |
| Male (%)                   | 100          | 100          | n.s.            |
| Hypertension (%)           | 100          | 100          | n.s.            |
| Diabetes (%)               | -            | 50           | n.s.            |
| Dyslipidemia (%)           | 100          | 100          | n.s.            |
| Smoking history            |              |              |                 |
| Present (%)                | -            | -            | n.s.            |
| Past (%)                   | -            | 100          | <i>p</i> < 0.05 |
| Number of affected vessels |              |              |                 |
| 1 vessel disease (%)       | -            | 50           | n.s.            |
| 2 vessel disease (%)       | -            | -            | n.s.            |
| 3 vessel disease (%)       | -            | 50           | n.s.            |
| Type of affected vessel    |              |              |                 |
| LAD (%)                    | -            | 50           | n.s.            |
| CFX (%)                    | -            | 100          | <i>p</i> < 0.05 |
| RCA (%)                    | -            | 50           | n.s.            |

Continuous data are expressed as mean ± SD; categorical data are expressed as percentage. LAD. left descending artery; CFX. circumflex coronary artery; RCA. right coronary artery; - = absence. Student *t*-test was used to assess significance.
